# Supplementary material for: Designing 2D–2D g-C3N4/Ag:ZnIn2S4 nanocomposites for the high-performance conversion of sunlight energy into hydrogen fuel and the meaningful reduction of pollution
Source: Royal Society of Chemistry journal article supplement (doi:10.1039/d0ra06226j), 2020-01-01
Supplement: d0ra06226j1.pdf [file d0ra06226j1.pdf]

## Electronic Supplementary Material

# Designing 2D-2D g-C<sub>3</sub>N<sub>4</sub>/Ag:ZnIn<sub>2</sub>S<sub>4</sub> nanocomposites for high-performance conversion of sunlight energy to hydrogen fuel and meaningful reduction of pollution

Yu Gao<sup>#a,b</sup>, Kun Qian<sup>#a,b</sup>, Baotong Xu<sup>a</sup>, Fu Ding<sup>\*a,b</sup>, Valerian Dragutan<sup>c</sup>, Ileana Dragutan<sup>\*c</sup>, Yaguang Sun<sup>a,b</sup>, Zhenhe Xu<sup>\*a,b</sup>

<sup>a</sup>The Key Laboratory of Inorganic Molecule-Based Chemistry of Liaoning Province, College of Materials and Engineering, Shenyang University of Chemical Technology, Shenyang 110142, P. R. China.

<sup>b</sup>Key Laboratory of Resource Chemical Technology and Materials (Ministry of Education), Shenyang University Chemical Technology, Shenyang, 110142, PR China

<sup>c</sup>Institute of Organic Chemistry, Romanian Academy, Spl. Independentei 202B, 060023 Bucharest, Romania

E-mail: dingfu@syuct.edu.cn (F. Ding), idragutan@yahoo.com (I. Dragutan), xuzh@syuct.edu.cn (Z. Xu)

<sup>#</sup>These authors contributed equally to this work.

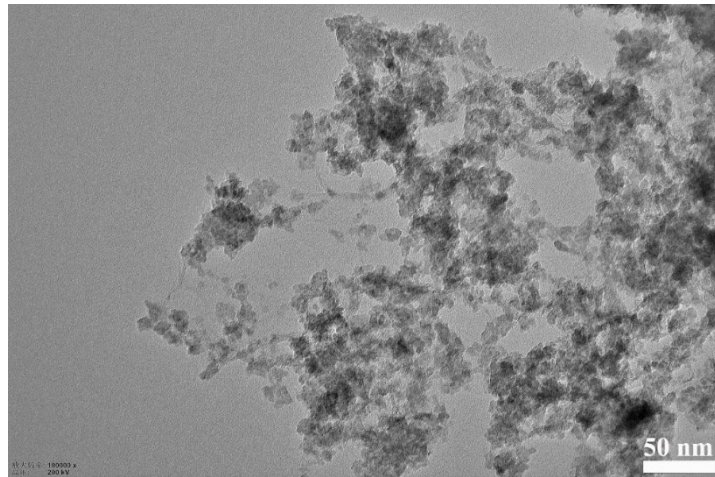

**Fig. S1.** TEM image of the Ag:ZnIn<sub>2</sub>S<sub>4</sub> sample.

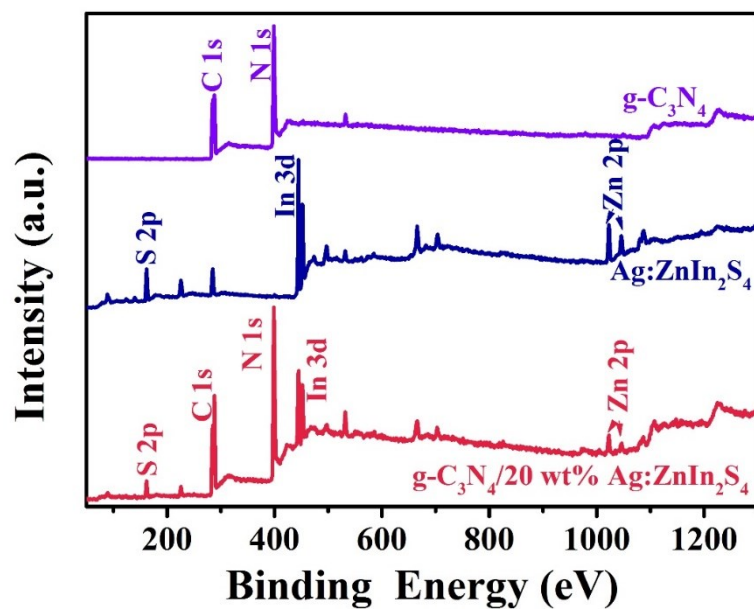

**Fig. S2.** XPS survey patterns of the g-C<sub>3</sub>N<sub>4</sub>, Ag:ZnIn<sub>2</sub>S<sub>4</sub>, and g-C<sub>3</sub>N<sub>4</sub>/20 wt% Ag:ZnIn<sub>2</sub>S<sub>4</sub> nanocomposites.

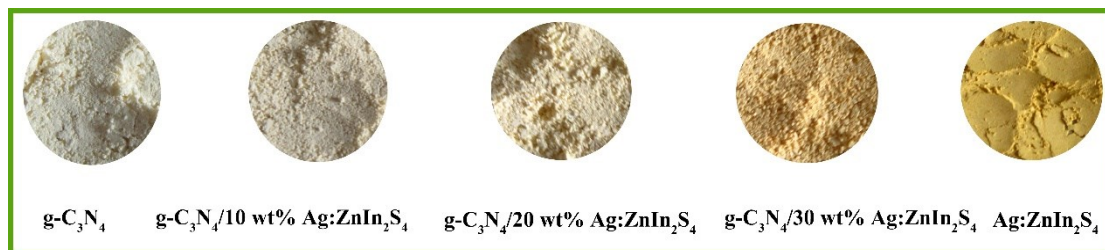

**Fig. S3.** Photographs of the  $g\text{-C}_3\text{N}_4$ ,  $\text{Ag:ZnIn}_2\text{S}_4$ , and  $g\text{-C}_3\text{N}_4/\text{Ag:ZnIn}_2\text{S}_4$  samples.

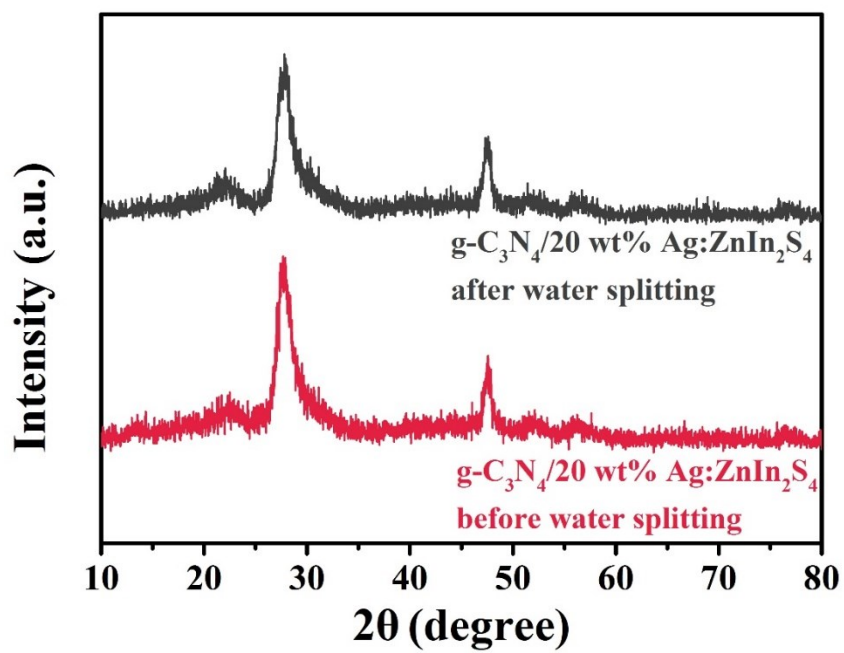

**Fig. S4.** XRD patterns of the g-C<sub>3</sub>N<sub>4</sub>/20 wt% Ag:ZnIn<sub>2</sub>S<sub>4</sub> sample before and after photocatalytic water splitting.

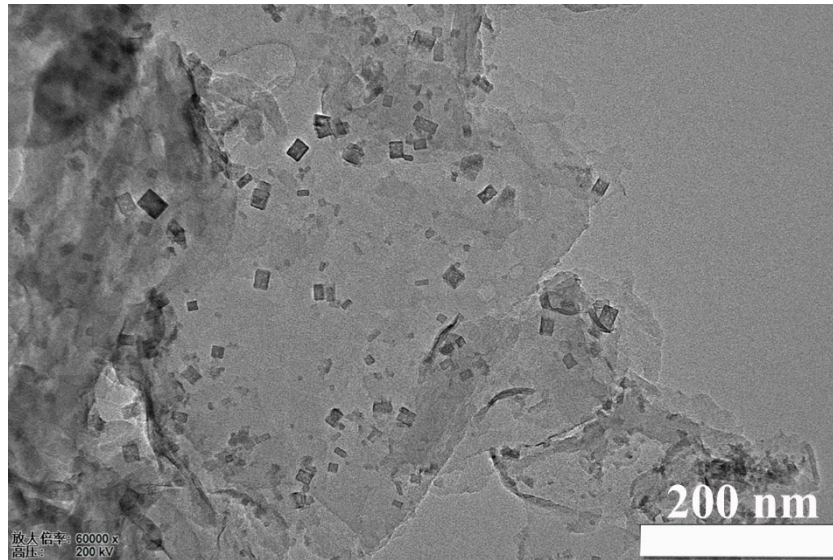

**Fig. S5.** TEM image of the g-C<sub>3</sub>N<sub>4</sub>/20 wt% Ag:ZnIn<sub>2</sub>S<sub>4</sub> sample after photocatalytic water splitting.

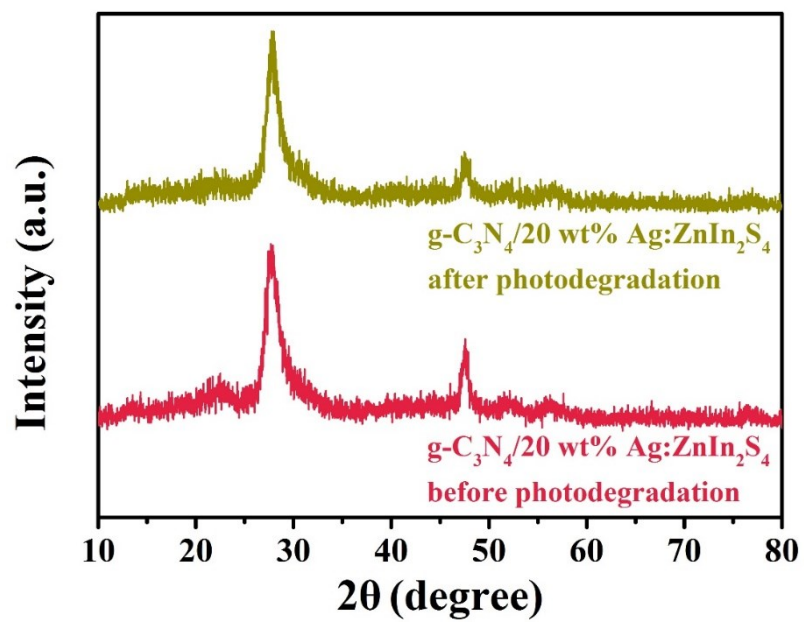

**Fig. S6.** XRD patterns of the g-C<sub>3</sub>N<sub>4</sub>/20 wt% Ag:ZnIn<sub>2</sub>S<sub>4</sub> sample before and after photodegradation of MO.

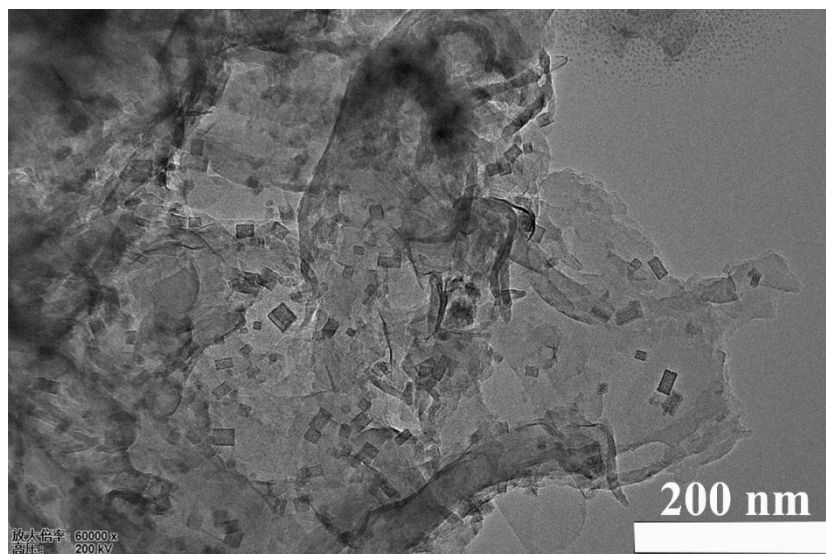

**Fig. S7.** TEM image of the g-C<sub>3</sub>N<sub>4</sub>/20 wt% Ag:ZnIn<sub>2</sub>S<sub>4</sub> sample after photodegradation of MO.
